# Supplementary material for: Preparation of Ag nanoparticles using hydrogen peroxide as a reducing agent
Source: Royal Society of Chemistry journal article supplement (doi:10.1039/c8nj01747f), 2018-01-01
Supplement: c8nj01747f1.pdf [file c8nj01747f1.pdf]

## Supporting Information

### Preparation of Ag Nanoparticles Using Hydrogen Peroxide as a Reducing Agent

Masamu Nishimoto and Tetsu Yonezawa\*

*Division of Materials Science and Engineering, Faculty of Engineering, Hokkaido University,  
Kita 13 Nishi 8, Kita-ku, Sapporo, Hokkaido 060-8628, Japan.*

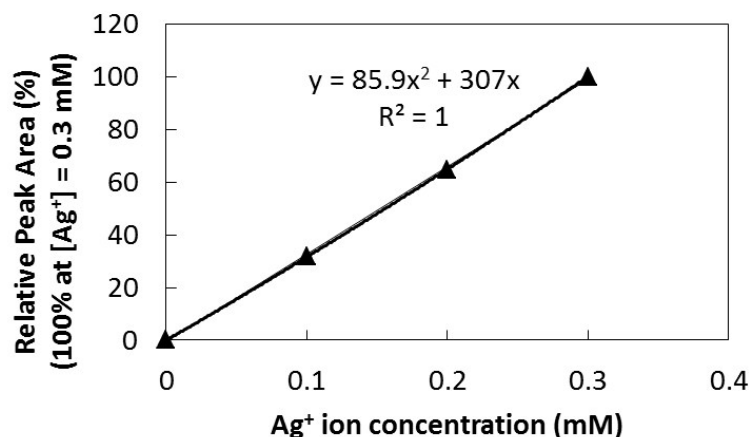

**Figure S1.** The calibration curve for the Ag<sup>+</sup> ion concentration calculated using the results of the UV-Vis spectra of the solutions with different Ag<sup>+</sup> concentrations.

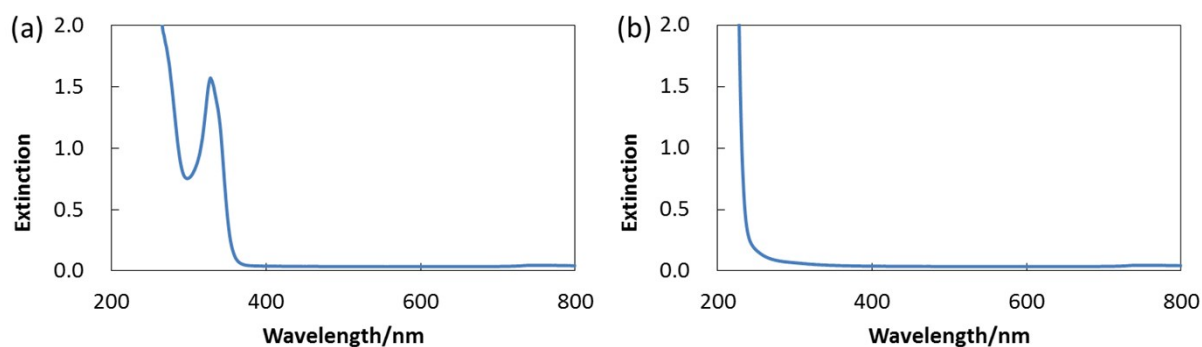

**Figure S2.** UV-Vis spectra of the reaction solution after the reaction (a) with and (b) without the addition of KI when the pH of the reaction solution was 12. In (a), a peak at around 330 nm corresponding to the coordination compound (PVP-[Ag<sub>m</sub>I<sub>n</sub>]<sup>(n-m)-</sup>) can be observed.
